# Supplementary material
Source: HighWire-hosted journal article supplement (https://svn.smart01.highwire.org/content/svn-2020-000343)
Supplement: inline-supplementary-material-1 [file inline-supplementary-material-1.pdf]

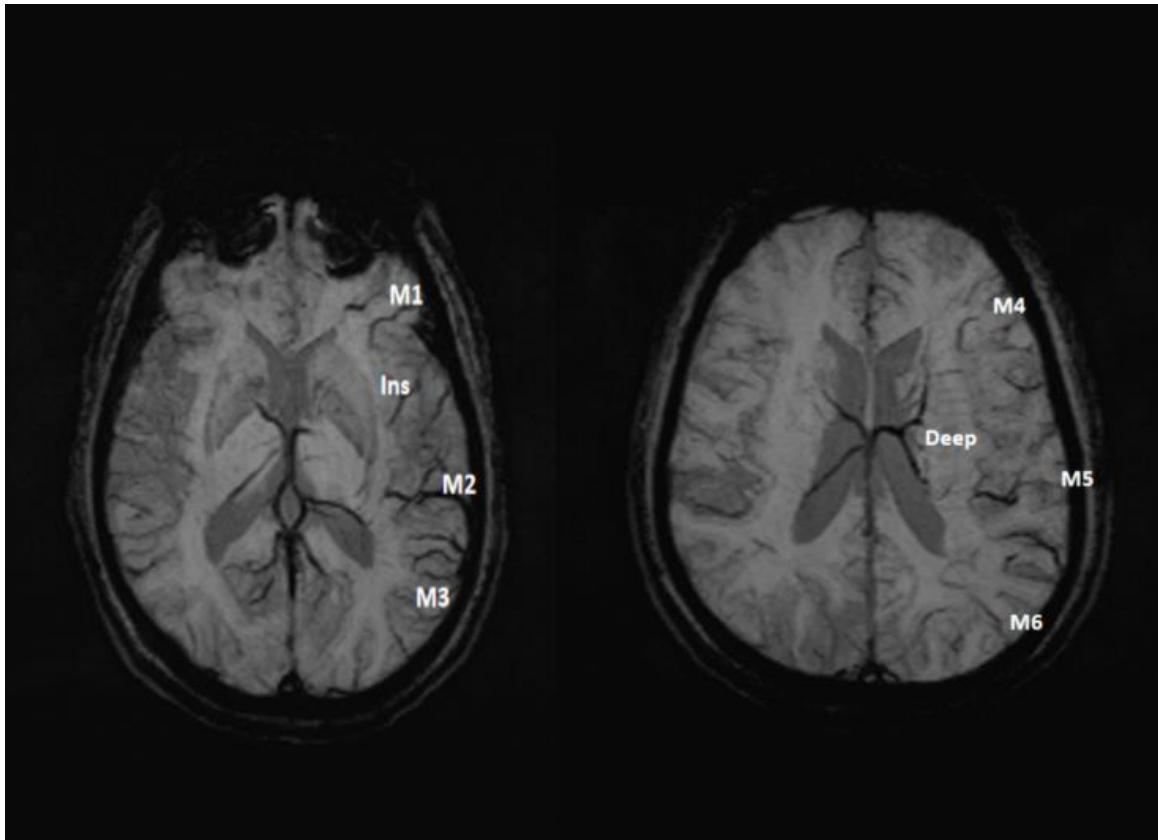

**Figure S1.** Eight areas were defined for grading of multiple hypointense vessels (MHVs). The defined areas were as follows: ‘Ins’, insular cortex; ‘M1’, anterior middle cerebral artery (MCA) cortex; ‘M2’, MCA cortex lateral to the insular cortex; ‘M3’, posterior MCA cortex; ‘M4’, ‘M5’, and ‘M6’, anterior, lateral, and posterior MCA territories immediately superior to ‘M1’, ‘M2’, and ‘M3’; and ‘Deep’, deep white matter. In this figure, MHVs in M1, M2, M3, Ins, M4, M5, M6, and Deep were evident on susceptibility-weighted imaging in the left hemisphere and defined as extensive MHVs.
